# Supplementary material for: Circulating microRNA and automated motion analysis as novel methods of assessing chemotherapy-induced peripheral neuropathy in mice
Source: PLoS One. 2019 Jan 24;14(1):e0210995. doi: 10.1371/journal.pone.0210995 (PMC6345499; doi:10.1371/journal.pone.0210995)
Supplement: S2 File — RT-qPCR results of miRNAs in plasma and tissue of JAX and CRL mice dosed with paclitaxel or vehicle. (XLSX) [file pone.0210995.s002.xlsx]

## Sheet: Fig 5-A
Group				Vehicle												Paclitaxel
Animal	1	2	3	4	5	6	7	8	Mean	SD	n		9	10	11	12	13	14	15	16	Mean	SD	n
Day 8/miR-124	1.4	1.4	0.4	1	0.6	n/a	n/a	n/a	0.96	0.45607	5		8.8	5.1	4.1	6	7.3				6.26	1.84472	5
Day 16/miR-124	0.4	0.6	0.7	0.5	3.5	0.6	0.9	1	1.025	1.01945	8		7.5	5.8	18.2	12.4	6.7	16.3	17.5	10	11.8	5.03984	8
Day 8/miR-183	1.4	1.2	0.9	1.1	0.8	n/a	n/a	n/a	1.08	0.238747	5		1.9	1.7	2.6	1.3	1.7				1.84	0.477493	5
Day 16/miR-183	1.7	0.9	0.5	1.1	1.2	0.8	0.5	0.9	0.95	0.392792	8		1.3	2.7	1.8	2	2.1	3	2.5	2.2	2.2	0.534522	8
Day 8/miR-338	0.6	0.4	1.6	0.6	0.8	n/a	n/a	n/a	0.8	0.469042	5		0.6	1.2	1.5	0.8	1				1.02	0.349285	5
Day 16/miR-338	0.5	0.6	0.5	3.8	1.4	1.4	0.6	0.2	1.125	1.16466	8		0.6	1.2	0.5	0.5	1	1.3	0.6	1.3	0.875	0.361544	8

## Sheet: Fig 5-B
Group				Vehicle													Paclitaxel
Animal	1	2	3	4	5	6	7	8	Mean	SD	SE	n		9	10	11	12	13	14	15	16	Mean	SD	SE	n
miR-124	38	13	40	13	10	21	12	14	20.125	12.0882	4.27383	8		34	78	45	25	142	48	16	36	53	40.4228	14.2916	8

## Sheet: Fig 5-C
Group				Vehicle												Paclitaxel
Animal	1	2	3	4	5	6	7	8	Mean	SD	n		9	10	11	12	13	14	15	16	Mean	SD	n
Day 8/miR-92	0.62	0.68	0.69	0.7	0.56				0.65	0.0591608	0.0209165		0.6	0.92	0.42	0.82	0.96				0.744	0.228648	0.0808393
Day 16/miR-92	1.05	0.83	0.81	0.82	1.19	1.83	1.12	2.25	1.2375	0.527873	0.186631		0.83	1	1.63	1.41	0.69	1.05	1.49	1.57	1.20875	0.360335	0.127397
Day 8/miR-181	1.05	0.83	0.81	0.82	1.19				0.94	0.171756	0.0607247		1.83	1.12	2.25	0.83	1				1.406	0.606325	0.214368
Day 16/miR-181	0.45	0.61	0.49	3.13	0.98	1.36	0.85	0.43	1.0375	0.903782	0.319535		0.56	1.04	0.6	0.93	0.95	0.93	1.18	0.91	0.8875	0.209336	0.0740113
Day 8/miR-192	1.5	0.79	1.17	1.19	2.07				1.344	0.477577	0.168849		1.22	1.16	0.86	2.18	0.99				1.282	0.521651	0.184431
Day 16/miR-192	1.03	0.69	0.8	0.63	0.91	0.69	0.82	0.7	0.78375	0.13437	0.047507		0.96	1.3	1.26	0.98	1.26	0.82	0.94	0.97	1.06125	0.182869	0.0646539

## Sheet: Fig 5-D
Group				Vehicle												Paclitaxel
Animal	1	2	3	4	5	6	7	8	Mean	SD	n		9	10	11	12	13	14	15	16	Mean	SD	n
DRG/miR-124	0.89	1.33	0.86	1.04	1.13	0.79	0.98	0.97	0.99875	0.170917	8		0.99	1.3	0.78	0.47	1.52	1.6	0.9	1.9	1.1825	0.478592	8
DRG/miR-338	0.84	1.37	1.14	1.21	1.27	0.6	0.69	0.88	1	0.285257	8		0.79	1.49	1.21	0.92	1.3	1.9	1.8	1.1	1.31375	0.395905	8
Sciatic Nerve/miR-124	0.41	1.54	0.77	0.84		1.78	0.56	1.1	1	0.505008	7		0.92	0.86	0.79	1	0.71	0.8	1.1	0.8	0.8725	0.127699	8
Sciatic Nerve/miR-338	0.37	1.74	0.95	1.04		1.07	0.63	1.21	1.00143	0.434834	7		0.89	0.85	1.01	1.27	0.68	0.6	0.8	1	0.8875	0.210017	8
Skeleton Muscle/miR-124	0.65	1.47	1.2	0.87	0.9	0.93	0.95	1.03	1	0.24454	8		0.7	0.7	0.83	0.66	1	0.94	1.63	0.97	0.92875	0.312887	8
Skeleton Muscle/miR-338	0.72	0.92	0.86	0.93	1.05	1.25	1.04	1.23	1	0.180792	8		0.92	1.06	0.94	0.94	1.93	0.45	1.69	0.75	1.085	0.487765	8
